# Supplementary material for: Genomic characterization of a newly established esophageal squamous cell carcinoma cell line from China and published esophageal squamous cell carcinoma cell lines
Source: Cancer Cell Int. 2020 May 24;20:184. doi: 10.1186/s12935-020-01268-x (PMC7247234; doi:10.1186/s12935-020-01268-x)
Supplement: Supplementary file 1 — Additional file 1: Table S1. ESCC cell line information from Cellosaurus and literatures. [file 12935_2020_1268_MOESM1_ESM.xlsx]

## Sheet: Sheet1
Cancer cell lines							immortalized esophageal epithelial cell lines
CVCL_Y008	CE146T/VGH	Homo sapiens (Human)					CVCL_UY83		CaES-17	Homo sapiens (Human)	Problematic cell line
CVCL_Y009	CE48T/VGH	Homo sapiens (Human)					CVCL_4T83		HET-2A	Homo sapiens (Human)	Problematic cell line
CVCL_Y010	CE69T/VGH	Homo sapiens (Human)					CVCL_4T84		HET1AR	Homo sapiens (Human)	bile acid tolerant strain
CVCL_Y011	CE81T/VGH	Homo sapiens (Human)					CVCL_3702	USA	HET-1A（HE-457）	Homo sapiens (Human)	Establishment and characterization of SV40 T-antigen immortalized human esophageal epithelial cells
CVCL_Y184	CE81T1	Homo sapiens (Human)					CVCL_4M96	shantou	SHEE10	Homo sapiens (Human)
CVCL_Y186	CE81T1-0	Homo sapiens (Human)						japan	CHEK-1	Immortalization of human esophageal keratinocytes by E6 and E7 of human papillomavirus type 16
CVCL_Y187	CE81T1-1	Homo sapiens (Human)						HK	NE83	Papillomavirus type 16 E6/E7 and human telomerase reverse transcriptase in esophageal cell immortalization and early transformation
CVCL_Y188	CE81T1-2	Homo sapiens (Human)						HK	ne108	Papillomavirus type 16 E6/E7 and human telomerase reverse transcriptase in esophageal cell immortalization and early transformation
CVCL_Y189	CE81T1-3	Homo sapiens (Human)						HK	ne6	Early upregulation of cyclooxygenase-2 in human papillomavirus type 16 and telomerase-induced immortalization of human esophageal epithelial cells
CVCL_Y190	CE81T1-4	Homo sapiens (Human)						HK	ne2	Genetic alterations in a telomerase-immortalized human esophageal epithelial cell line: implications for carcinogenesis
CVCL_Y185	CE81T2	Homo sapiens (Human)						japan	epc1	Telomerase induces immortalization of human esophageal keratinocytes without p16INK4a inactivation
CVCL_Y191	CE81T2-1	Homo sapiens (Human)						japan	epc2	Telomerase induces immortalization of human esophageal keratinocytes without p16INK4a inactivation	EPC1/EPC2 cells: Primary human esophageal keratinocytes EPC1/EPC2-hTERT: hTERT immortalized human esophageal keratinocytes EPC1: Cells derived from a 65-year-old male, who underwent esophagectomy for squamous esophageal cancer following pre-operative radiotherapy and chemotherapy. Specimen was harvested from a morphologically normal site. No H&E is available. EPC2: Cells derived from a 55-year-ol…
CVCL_Y192	CE81T2-4	Homo sapiens (Human)						HK	ne3	Cytogenetic aberrations in immortalization of esophageal epithelial cells
CVCL_1131	COLO 680N	Homo sapiens (Human)						HK	ne1	Distinct profiles of critically short telomeres are a key determinant of different chromosome aberrations in immortalized human cells:whole-genome evidence from multiple cell lines
CVCL_E309	CSEC [Human]	Homo sapiens (Human)
CVCL_EP99	E254	Homo sapiens (Human)
CVCL_EQ08	E319	Homo sapiens (Human)
CVCL_EQ13	E326	Homo sapiens (Human)
CVCL_1187	EC-GI-10	Homo sapiens (Human)
CVCL_6897	EC109/CDDP	Homo sapiens (Human)
CVCL_T047	EC109/Taxol	Homo sapiens (Human)
CVCL_4N02	EC8501	Homo sapiens (Human)
CVCL_E314	EC8712	Homo sapiens (Human)
CVCL_E315	EC8733	Homo sapiens (Human)
CVCL_E307	EC9706	Homo sapiens (Human)
CVCL_5V05	EC9706 clone EC1	Homo sapiens (Human)
CVCL_5V06	EC9706 clone EC2	Homo sapiens (Human)
CVCL_5V07	EC9706 clone EC3	Homo sapiens (Human)
CVCL_6898	Eca-109	Homo sapiens (Human)
CVCL_E310	ESC-410	Homo sapiens (Human)
CVCL_Y209	ESC/LCM10T-N	Homo sapiens (Human)
CVCL_Y210	ESC/LCM11T-N	Homo sapiens (Human)
CVCL_Y211	ESC/LCM12T-N	Homo sapiens (Human)
CVCL_Y212	ESC/LCM14T-N	Homo sapiens (Human)
CVCL_Y213	ESC/LCM15T-N	Homo sapiens (Human)
CVCL_Y214	ESC/LCM16T-N	Homo sapiens (Human)
CVCL_Y215	ESC/LCM17T-N	Homo sapiens (Human)
CVCL_Y216	ESC/LCM18T	Homo sapiens (Human)
CVCL_Y279	ESC/LCM1T	Homo sapiens (Human)
CVCL_Y218	ESC/LCM20T-N	Homo sapiens (Human)
CVCL_Y219	ESC/LCM21T-N	Homo sapiens (Human)
CVCL_Y220	ESC/LCM22T-N	Homo sapiens (Human)
CVCL_Y221	ESC/LCM23T	Homo sapiens (Human)
CVCL_Y222	ESC/LCM24T-N	Homo sapiens (Human)
CVCL_Y223	ESC/LCM25T-N	Homo sapiens (Human)
CVCL_Y224	ESC/LCM26T-N	Homo sapiens (Human)
CVCL_Y225	ESC/LCM27T-N	Homo sapiens (Human)
CVCL_Y226	ESC/LCM29T-N	Homo sapiens (Human)
CVCL_Y217	ESC/LCM2T-N	Homo sapiens (Human)
CVCL_Y228	ESC/LCM31T-N	Homo sapiens (Human)
CVCL_Y229	ESC/LCM32T-N	Homo sapiens (Human)
CVCL_Y230	ESC/LCM33T	Homo sapiens (Human)
CVCL_Y231	ESC/LCM34T-N	Homo sapiens (Human)
CVCL_Y232	ESC/LCM35T-N	Homo sapiens (Human)
CVCL_Y233	ESC/LCM36T	Homo sapiens (Human)
CVCL_Y234	ESC/LCM37T-N	Homo sapiens (Human)
CVCL_Y235	ESC/LCM38T-N	Homo sapiens (Human)
CVCL_Y236	ESC/LCM39T-N	Homo sapiens (Human)
CVCL_Y227	ESC/LCM3T-N	Homo sapiens (Human)
CVCL_Y238	ESC/LCM40T	Homo sapiens (Human)
CVCL_Y239	ESC/LCM41T-N	Homo sapiens (Human)
CVCL_Y240	ESC/LCM42T-N	Homo sapiens (Human)
CVCL_Y241	ESC/LCM43T-N	Homo sapiens (Human)
CVCL_Y242	ESC/LCM44T-N	Homo sapiens (Human)
CVCL_Y243	ESC/LCM45T-N	Homo sapiens (Human)
CVCL_Y244	ESC/LCM46T-N	Homo sapiens (Human)
CVCL_Y245	ESC/LCM47T-N	Homo sapiens (Human)	#N/A
CVCL_Y246	ESC/LCM48T-N	Homo sapiens (Human)	#N/A
CVCL_Y247	ESC/LCM49T-N	Homo sapiens (Human)	#N/A
CVCL_Y237	ESC/LCM4T-N	Homo sapiens (Human)	#N/A
CVCL_Y249	ESC/LCM50T-N	Homo sapiens (Human)	#N/A
CVCL_Y250	ESC/LCM51T-N	Homo sapiens (Human)	#N/A
CVCL_Y251	ESC/LCM52T-N	Homo sapiens (Human)	#N/A
CVCL_Y252	ESC/LCM53T-N	Homo sapiens (Human)	#N/A
CVCL_Y253	ESC/LCM54T-N	Homo sapiens (Human)	#N/A
CVCL_Y254	ESC/LCM55T-N	Homo sapiens (Human)	#N/A
CVCL_Y255	ESC/LCM56T-N	Homo sapiens (Human)	#N/A
CVCL_Y256	ESC/LCM57T-N	Homo sapiens (Human)	#N/A
CVCL_Y257	ESC/LCM58T-N	Homo sapiens (Human)	#N/A
CVCL_Y258	ESC/LCM59T-N	Homo sapiens (Human)	#N/A
CVCL_Y248	ESC/LCM5T	Homo sapiens (Human)	#N/A
CVCL_Y260	ESC/LCM60T-N	Homo sapiens (Human)	#N/A
CVCL_Y261	ESC/LCM61T-N	Homo sapiens (Human)	#N/A
CVCL_Y262	ESC/LCM62T-N	Homo sapiens (Human)	#N/A
CVCL_Y263	ESC/LCM66T-N	Homo sapiens (Human)	#N/A
CVCL_Y264	ESC/LCM67T-N	Homo sapiens (Human)	#N/A
CVCL_Y265	ESC/LCM69T-N	Homo sapiens (Human)	#N/A
CVCL_Y259	ESC/LCM6T	Homo sapiens (Human)	#N/A
CVCL_Y267	ESC/LCM70T-N	Homo sapiens (Human)	#N/A
CVCL_Y268	ESC/LCM71T-N	Homo sapiens (Human)	#N/A
CVCL_Y266	ESC/LCM7T	Homo sapiens (Human)	#N/A
CVCL_Y269	ESC/LCM8T-N	Homo sapiens (Human)	#N/A
CVCL_Y270	ESC/LCM9T-N	Homo sapiens (Human)	#N/A
CVCL_A355	HCE-3	Homo sapiens (Human)	#N/A		Cytogenetic Studies of Esophageal Carcinoma Cell Lines
CVCL_1271	HCE-4	Homo sapiens (Human)	#N/A
CVCL_A356	HCE-5	Homo sapiens (Human)	#N/A
CVCL_A357	HCE-6	Homo sapiens (Human)	#N/A
CVCL_5138	HCE-7	Homo sapiens (Human)	#N/A
CVCL_A358	HCE-8	Homo sapiens (Human)	#N/A
CVCL_S846	HCE-9	Homo sapiens (Human)	#N/A
CVCL_M850	HCu 10	Homo sapiens (Human)	HCu 10	problematic cell line
CVCL_M851	HCu 13	Homo sapiens (Human)	#N/A
CVCL_M852	HCu 18	Homo sapiens (Human)	HCu 18	problematic cell line
CVCL_M853	HCu 22	Homo sapiens (Human)	HCu 22	problematic cell line
CVCL_M854	HCu 27	Homo sapiens (Human)	HCu 27	problematic cell line
CVCL_M855	HCu 33	Homo sapiens (Human)	HCu 33	problematic cell line
CVCL_M859	HCu 35	Homo sapiens (Human)	#N/A
CVCL_M856	HCu 37	Homo sapiens (Human)	HCu 37	problematic cell line
CVCL_M857	HCu 39	Homo sapiens (Human)	HCu 39	problematic cell line
CVCL_M860	HCu 57	Homo sapiens (Human)	#N/A
CVCL_T734	HEC-46	Homo sapiens (Human)	#N/A
CVCL_D568	HKESC-1	Homo sapiens (Human)	#N/A
CVCL_S525	HKESC-1/cis	Homo sapiens (Human)	#N/A
CVCL_D571	HKESC-2	Homo sapiens (Human)	#N/A
CVCL_D572	HKESC-3	Homo sapiens (Human)	#N/A
CVCL_E304	HKESC-4	Homo sapiens (Human)	#N/A
CVCL_N661	Hs 285.T	Homo sapiens (Human)	#N/A
CVCL_JH11	HSA/c	Homo sapiens (Human)	#N/A
CVCL_1F87	KAN-ES	Homo sapiens (Human)	#N/A
CVCL_WK75	KE-10	Homo sapiens (Human)	#N/A
CVCL_D883	KE-3	Homo sapiens (Human)	#N/A
CVCL_D884	KE-4	Homo sapiens (Human)	#N/A
CVCL_WK76	KE-5	Homo sapiens (Human)	#N/A
CVCL_WK77	KE-6	Homo sapiens (Human)	#N/A
CVCL_WK78	KE-7	Homo sapiens (Human)	#N/A
CVCL_WK79	KE-8	Homo sapiens (Human)	#N/A
CVCL_VJ85	KSE-1	Homo sapiens (Human)	#N/A
CVCL_VJ86	KSE-2	Homo sapiens (Human)	#N/A
CVCL_1643	KYSE-110	Homo sapiens (Human)	#N/A
CVCL_A097	KYSE-1140	Homo sapiens (Human)	#N/A
CVCL_A098	KYSE-1170	Homo sapiens (Human)	#N/A
CVCL_8501	KYSE-1190	Homo sapiens (Human)	#N/A
CVCL_8502	KYSE-1230	Homo sapiens (Human)	#N/A
CVCL_A099	KYSE-1240	Homo sapiens (Human)	#N/A
CVCL_A100	KYSE-1250	Homo sapiens (Human)	#N/A
CVCL_8503	KYSE-1260	Homo sapiens (Human)	#N/A
CVCL_1347	KYSE-140	Homo sapiens (Human)	#N/A
CVCL_8504	KYSE-1440	Homo sapiens (Human)	#N/A
CVCL_1348	KYSE-150	Homo sapiens (Human)	#N/A
CVCL_1358	KYSE-170	Homo sapiens (Human)	#N/A
CVCL_1349	KYSE-180	Homo sapiens (Human)	#N/A
CVCL_A101	KYSE-1860	Homo sapiens (Human)	#N/A
CVCL_8301	KYSE-190	Homo sapiens (Human)	#N/A
CVCL_G698	KYSE-200	Homo sapiens (Human)	#N/A
CVCL_A102	KYSE-201	Homo sapiens (Human)	#N/A
CVCL_1359	KYSE-220	Homo sapiens (Human)	#N/A
CVCL_J284	KYSE-2270	Homo sapiens (Human)	#N/A
CVCL_4W14	KYSE-2300	Homo sapiens (Human)	#N/A
CVCL_8505	KYSE-2400	Homo sapiens (Human)	#N/A
CVCL_Y278	KYSE-2650	Homo sapiens (Human)	#N/A
CVCL_1350	KYSE-270	Homo sapiens (Human)	#N/A
CVCL_4W15	KYSE-2710	Homo sapiens (Human)	#N/A
CVCL_A104	KYSE-273	Homo sapiens (Human)	#N/A
CVCL_J283	KYSE-2780	Homo sapiens (Human)	#N/A
CVCL_S527	KYSE-280	Homo sapiens (Human)	#N/A
CVCL_4W16	KYSE-2880	Homo sapiens (Human)	#N/A
CVCL_1351	KYSE-30	Homo sapiens (Human)	#N/A
CVCL_J285	KYSE-3210	Homo sapiens (Human)	#N/A
CVCL_8506	KYSE-3410	Homo sapiens (Human)	#N/A
CVCL_8507	KYSE-350	Homo sapiens (Human)	#N/A
CVCL_G699	KYSE-360	Homo sapiens (Human)	#N/A
CVCL_M252	KYSE-3650	Homo sapiens (Human)	#N/A
CVCL_4W17	KYSE-3940	Homo sapiens (Human)	#N/A
CVCL_1352	KYSE-410	Homo sapiens (Human)	#N/A
CVCL_1353	KYSE-450	Homo sapiens (Human)	#N/A
CVCL_1360	KYSE-50	Homo sapiens (Human)	#N/A
CVCL_1354	KYSE-510	Homo sapiens (Human)	#N/A
CVCL_1355	KYSE-520	Homo sapiens (Human)	#N/A
CVCL_8508	KYSE-590	Homo sapiens (Human)	#N/A
CVCL_1356	KYSE-70	Homo sapiens (Human)	#N/A
CVCL_8509	KYSE-770	Homo sapiens (Human)	#N/A
CVCL_8510	KYSE-790	Homo sapiens (Human)	#N/A
CVCL_8511	KYSE-850	Homo sapiens (Human)	#N/A
CVCL_A103	KYSE-890	Homo sapiens (Human)	#N/A
CVCL_8512	KYSE-960	Homo sapiens (Human)	#N/A
CVCL_WL07	OC-1	Homo sapiens (Human)	#N/A
CVCL_WL08	OC-2	Homo sapiens (Human)	#N/A
CVCL_2661	OE21	Homo sapiens (Human)	#N/A
CVCL_E312	OSC-1 [Human esophageal squamous cell carcinoma]	Homo sapiens (Human)	#N/A
CVCL_E313	OSC-2 [Human esophageal squamous cell carcinoma]	Homo sapiens (Human)	#N/A
CVCL_WL04	RBM3	Homo sapiens (Human)	#N/A
CVCL_E305	SLMT-1	Homo sapiens (Human)	#N/A
CVCL_JH10	SUm/C	Homo sapiens (Human)	#N/A
CVCL_1E55	SW451	Homo sapiens (Human)	#N/A
CVCL_3174	T.T	Homo sapiens (Human)	#N/A
CVCL_3175	T.Tn	Homo sapiens (Human)	#N/A
CVCL_1759	TE-1	Homo sapiens (Human)	#N/A
CVCL_1760	TE-10	Homo sapiens (Human)	#N/A
CVCL_1761	TE-11	Homo sapiens (Human)	#N/A
CVCL_1762	TE-12	Homo sapiens (Human)	TE-12	problematic cell line
CVCL_4463	TE-13	Homo sapiens (Human)	TE-13	problematic cell line
CVCL_3336	TE-14	Homo sapiens (Human)	#N/A
CVCL_1763	TE-15	Homo sapiens (Human)	#N/A
CVCL_4455	TE-2	Homo sapiens (Human)	TE-2	problematic cell line
CVCL_9971	TE-3	Homo sapiens (Human)	TE-3	problematic cell line
CVCL_3337	TE-4	Homo sapiens (Human)	#N/A
CVCL_1764	TE-5	Homo sapiens (Human)	#N/A
CVCL_1765	TE-6	Homo sapiens (Human)	#N/A
CVCL_8325	TE-6/Hypo	Homo sapiens (Human)	#N/A
CVCL_9972	TE-7	Homo sapiens (Human)	TE-7	problematic cell line
CVCL_1766	TE-8	Homo sapiens (Human)	#N/A
CVCL_1767	TE-9	Homo sapiens (Human)	#N/A
CVCL_VH05	TH [Human esophageal squamous cell carcinoma]	Homo sapiens (Human)	#N/A
CVCL_VH06	TS	Homo sapiens (Human)	#N/A
CVCL_7752	UM-SCC-40	Homo sapiens (Human)	#N/A
CVCL_E321	YES-1	Homo sapiens (Human)	#N/A
CVCL_E322	YES-2	Homo sapiens (Human)	#N/A
CVCL_S526	YES-2CSC	Homo sapiens (Human)	#N/A
CVCL_E323	YES-3	Homo sapiens (Human)	#N/A
CVCL_S528	YES-4	Homo sapiens (Human)	#N/A
CVCL_S529	YES-5	Homo sapiens (Human)	#N/A
CVCL_S530	YES-6	Homo sapiens (Human)	#N/A
CVCL_AP55	YM-1	Homo sapiens (Human)	#N/A
CVCL_VT79	ZEC-014	Homo sapiens (Human)	#N/A
CVCL_VT80	ZEC-043	Homo sapiens (Human)	#N/A
CVCL_VT81	ZEC-056	Homo sapiens (Human)	#N/A
CVCL_VT82	ZEC-061	Homo sapiens (Human)	#N/A
CVCL_VT83	ZEC-118	Homo sapiens (Human)	#N/A
CVCL_VT84	ZEC-127	Homo sapiens (Human)	#N/A
CVCL_VT85	ZEC-134	Homo sapiens (Human)	#N/A
CVCL_VT86	ZEC-145	Homo sapiens (Human)	#N/A
CVCL_VT87	ZEC-157	Homo sapiens (Human)	#N/A
CVCL_VT88	ZEC-166	Homo sapiens (Human)	#N/A
CVCL_VT89	ZEC-219	Homo sapiens (Human)	#N/A
CVCL_RX98	EC/CUHK2	Homo sapiens (Human)	Expression of a new surface membrane antigen (SQM1) in tumor cells cultured in media with different calcium ion levels
CVCL_RY08	EC/CUHK1	Homo sapiens (Human)	Biological characteristics of a newly established human oesophageal carcinoma cell line
